# Supplementary material for: Differential involvement of dopamine receptor subtypes in the acquisition of Pavlovian sign-tracking and goal-tracking responses
Source: PubMed Central journal article supplement (PMC6602989; doi:10.1007/s00213-019-5169-8), 2019-01-25

## **Supplemental Material**

Psychopharmacology

Differential involvement of dopamine receptor subtypes in the acquisition of Pavlovian sign-tracking and goal-tracking responses

Stephanie Roughley, PhD

School of Psychology, UNSW Sydney, Sydney, NSW 2052, Australia

Simon Killcross, PhD

School of Psychology, UNSW Sydney, Sydney, NSW 2052, Australia

E-mail: [s.killcross@unsw.edu.au](mailto:s.killcross@unsw.edu.au)

Tel: +61 2 9385 3034

Fax: +61 2 9385 1193

## Methods

### *Profile of Sign-Tracking Wistar rats*

We have run a large number of experiments utilizing a sign-tracking protocol in the lab, and consistently find that nearly all of the Wistar rats from our supplier (BRC Laboratory Animal Service, University of Adelaide, SA, Australia) acquire a robust sign-tracking response that comes to dominate almost exclusively over goal-tracking responding. The typical behavioural profile is as follows: in the first few training sessions we observe an initial increase in both lever-pressing (sign-tracking) and magazine approach (goal-tracking) during CS presentation. However, whilst sign-tracking behaviour continues to increase across training, rates of goal-tracking gradually decline. By the 8<sup>th</sup> session of training, animals respond on the lever at a rate of on average 27.3 lever-presses per minute, whilst goal-tracking has dropped to on average 4.1 magazine-entries per minute. With further training, magazine-entry behaviour actually becomes suppressed during the CS period, relative to baseline rates of responding (PreCS period; on average 5.1 magazine-entries per minute on the 8<sup>th</sup> session).

These averages were calculated using data from the control animals in experiments that were conducted in the lab (currently unpublished data) using the sign-tracking parameters outlined here (i.e. lever CS as described, presented for 10s per trial, with short ~60s ITI). These data are presented in Figure S1, which shows rates of lever-press and magazine-entry responding over 12 sessions of training (some experiments did train longer than this).

In addition to looking at the typical behavioural profile, we also calculated a response bias for each animal, based on the total number of lever-presses and magazine-entries performed during CS presentations in a given session, averaged across the final three sessions of training. This was calculated as  $[\text{lever-presses} - \text{magazine-entries}] / [\text{lever-presses} + \text{magazine-entries}]$ , such that +1.0 would indicate exclusive sign-tracking, -1.0 would indicate exclusive goal-tracking, and 0 would indicate no bias. Of a total  $n = 251$ , 233 animals displayed a preference for sign-tracking (bias score  $> 0.3$ ), 7 displayed a preference for goal-tracking (bias score  $< -0.3$ ), and 11 displayed no preference (bias score between -0.3 and 0.3). This equates to 92.8% we would class as “sign-trackers”, 2.8% “goal-trackers” and 4.4% indeterminate. It is worth noting that of the animals that displayed no strong preference either way, all nonetheless demonstrated robust lever-press behaviour. Based on these data, we reasonably expect that in approximately 97% of cases an animal will develop a substantial sign-tracking response that can be measured.

## Results

### Experiment 1

#### *Sign-Tracking: Additional statistics on lever-press responding*

For lever-press responding during the CS in groups trained on the sign-tracking procedure, there were also main effects of Session in both the drug-treatment and post-treatment periods ( $F_{6,132} = 14.718, p < 0.001$ ;  $F_{4,88} = 8.969, p < 0.001$ , respectively) in addition to the main effects of Group. Furthermore, simple effects analyses of significant Session by Group interactions ( $F_{6,132} = 16.466, p < 0.001$ ;  $F_{4,88} = 4.613, p < 0.05$ , respectively) revealed that an increase in responding across session was specific to the saline-treated group during the treatment period ( $F_{6,17} = 10.215, p < 0.001$ ;  $F < 1$  for  $\alpha$ -flupenthixol) and the  $\alpha$ -flupenthixol-treated group during post-treatment period ( $F_{4,19} = 7.275, p < 0.05$ ;  $F < 1$  for saline).

#### *Sign-Tracking: Magazine-entry responding*

For magazine entry responding during lever CS presentations in groups trained on the sign-tracking procedure (Figure S2), two-way ANOVAs performed for drug-treatment and post-treatment periods (sessions 1-7 and 8-12, respectively) indicate that  $\alpha$ -flupenthixol-treated animals responded at a lower rate relative to saline-treated controls during the drug-treatment period ( $F_{1,22} = 7.975, p < 0.05$ ) and at a higher rate during the post-treatment period ( $F_{1,22} = 88.494, p < 0.001$ ). Across the drug-treatment sessions, there was also a significant main effect of Session ( $F_{6,132} = 3.720, p < 0.05$ ), reflecting a decline in magazine entry responding (linear trend  $F_{1,22} = 7.709, p < 0.05$ ), and a significant Session by Group interaction ( $F_{6,132} = 6.139, p < 0.001$ ). Simple effects analysis demonstrates that the effect of Session was significant in both saline- and  $\alpha$ -flupenthixol-treated groups ( $F_{6,17} = 8.626, p < 0.001$  and  $F_{6,17} = 5.232, p < 0.05$ , respectively). However, differences in the change across sessions for saline- vs.  $\alpha$ -flupenthixol-treated groups are indicated by pairwise comparisons that show responding for the saline-treated group was higher than in the  $\alpha$ -flupenthixol-treated group on sessions 1, 2, 3, and 5 (minimum  $F_{1,22} = 5.332, p < 0.05$ ), but not on sessions 4, 6, and 7 (maximum  $F_{1,22} = 1.920, p > 0.05$ ). In the post-treatment sessions, the main effect of Session was again significant ( $F_{4,88} = 13.090, p < 0.001$ ), reflecting further decline in magazine entry responding (linear trend  $F_{1,22} = 22.332, p < 0.001$ ), but there was no significant interaction ( $F_{4,88} = 2.357, p > 0.05$ ).

#### *Goal-Tracking: Additional statistics on magazine-entry responding*

For magazine entry responding during the CS period for animals trained on the goal-tracking procedure, a main effect of Session was also observed in both drug-treatment and post-treatment periods ( $F_{6,132} = 5.358, p < 0.001$ ;  $F_{4,88} = 7.259, p < 0.001$ , respectively). There was also a Session by Group interaction in the treatment period ( $F_{6,132} = 6.661, p < 0.001$ ;  $F_{4,88} = 1.679, p > 0.05$  in the post-treatment period), but follow-up simple effects did not reveal any meaningful differences.

For magazine entry responding during the PreCS period for groups trained on the goal-tracking procedure (Figure S3), two-way ANOVAs performed for drug-treatment and post-treatment periods (sessions 1-7 and 8-12, respectively) revealed a significant main effect of Group ( $F_{1,22} = 36.148, p < 0.001$ ) in the drug-treatment period, whereby responding was lower in the  $\alpha$ -flupenthixol-treated group compared to the saline-treated group. There was also a main effect of Session ( $F_{6,132} = 3.231, p < 0.05$ ), but no Session by Group interaction ( $F_{6,132} = 1.755, p > 0.05$ ). In the post-treatment period, no effects were significant (Session,  $F_{4,88} = 1.710, p > 0.05$ ; Group,  $F < 1$ ; Session by Group interaction,  $F_{4,88} = 2.033, p > 0.05$ ).

## Experiment 2

### *Sign-Tracking: Additional statistics on lever-press responding*

For lever-press responding during the CS in groups trained on the sign-tracking procedure, there was a significant main effect of Session across the drug-treatment and post-treatment periods ( $F_{6,84} = 28.757, p < 0.001$  and  $F_{4,56} = 7.913, p < 0.001$ , respectively) in addition to main effects of Group. Furthermore, there was a Session by Group interaction in both periods ( $F_{6,84} = 29.254, p < 0.001$  and  $F_{4,56} = 5.775, p < 0.05$ , respectively), which for the drug-treatment period simple effects analysis revealed was a function of a significant effect of Session in the saline-treated group ( $F_{6,9} = 8.120, p < 0.05$ ), but not the SCH39166-treated group ( $F < 1$ ). Simple effects analysis of the interaction in the post-treatment period did not reveal any meaningful differences.

### *Sign-Tracking: Magazine-entry responding*

For magazine entry responding during lever CS presentations in groups trained on the sign-tracking procedure (Figure S4), two-way ANOVAs performed for drug-treatment and post-treatment periods (sessions 1-7 and 8-12, respectively) indicate that SCH39166-treated animals responded at a lower rate relative to saline-treated controls during the drug-treatment period

( $F_{1,14} = 29.405, p < 0.001$ ), and at a higher rate during the post-treatment period ( $F_{1,14} = 61.711, p < 0.001$ ). Across the drug-treatment sessions, there was also a significant main effect of Session ( $F_{6,84} = 9.071, p < 0.001$ ), reflecting an initial increase, followed by decline, in magazine entry responding (quadratic trend,  $F_{1,14} = 25.372, p < 0.001$ ), and a significant Session by Group interaction ( $F_{6,84} = 11.648, p < 0.001$ ). Simple effects analysis demonstrates that the effect of Session was significant in the saline- but not the SCH39166-treated group ( $F_{6,9} = 11.404, p = 0.001$  and  $F_{6,9} = 1.095, p > 0.05$ , respectively); responding in the SCH39166-treated group remained at a similarly low level throughout the drug-treatment period. In the post-treatment sessions there was also a significant main effect of Session ( $F_{4,56} = 6.206, p < 0.001$ ), again reflecting an initial increase followed by decline (quadratic trend,  $F_{1,14} = 15.506, p = 0.001$ ), as well as a Session by Group interaction ( $F_{4,56} = 3.703, p < 0.05$ ). In this instance, simple effects analysis revealed that the effect of Session was attributable to the SCH39166-treated group ( $F_{4,11} = 17.045, p < 0.001$ ), not the saline-treated group ( $F < 1$ ); responding in the saline-treated group remained at a similarly low level throughout this period.

*Goal-Tracking: Additional statistics on magazine-entry responding*

For magazine entry responding during the CS-PreCS period for animals trained on the goal-tracking procedure, there was a main effect of Session across both the drug-treatment and post-treatment periods ( $F_{6,84} = 20.117, p < 0.001$  and  $F_{4,56} = 15.602, p < 0.001$ , respectively). There was also a Session by Group interaction in the drug-treatment period ( $F_{6,84} = 7.071, p < 0.001$ ) but not the post-treatment period ( $F < 1$ ). Simple effects analysis showed this interaction was due to a significant Session effect in the saline-treated group ( $F_{6,9} = 11.335, p < 0.05$ ) but not the SCH39166-treated group ( $F_{6,9} = 2.170, p > 0.05$ ).

Looking at PreCS responding only (Figure S5a), two way ANOVAs performed for the drug-treatment and post-treatment periods (session 1-7 and 8-12, respectively) indicate that magazine entry responding in the SCH39166-treated groups was significantly lower than in saline-treated groups during the drug-treatment period ( $F_{1,14} = 26.683, p < 0.001$ ), but significantly higher during the post-treatment period ( $F_{1,14} = 13.058, p < 0.05$ ). In the drug-treatment period the effect of Session was also significant ( $F_{6,84} = 5.690, p < 0.001$ ), though this did not reflect any interpretable change in the pattern of responding (significant trends at the 1<sup>st</sup>, 2<sup>nd</sup>, 3<sup>rd</sup>, and 4<sup>th</sup> order; minimum  $F_{1,14} = 4.733, p < 0.05$ ). There was no Session by Group interaction ( $F < 1$ ). In the post-treatment period no other effects were significant (both  $F < 1$ ).

Looking only at responding in the CS period (Figure S5b), similar analyses revealed that responding in the SCH39166-treated groups was significantly impaired relative to saline-treated controls during the drug-treatment period ( $F_{1,14} = 58.089, p < 0.001$ ), but not during the post-treatment period ( $F_{1,14} = 1.745, p > 0.05$ ). In the drug-treatment period, there was also a significant effect of Session ( $F_{6,84} = 19.273, p < 0.001$ ), reflecting an increase in responding across training (linear trend,  $F_{1,14} = 61.494, p < 0.001$ ). There was also a significant Session by Group interaction ( $F_{6,84} = 5.020, p < 0.001$ ), but simple effects analysis did not reveal any meaningful group differences in the change in responding across sessions. In the post-treatment period, there was a main effect of Session ( $F_{4,56} = 13.447, p < 0.001$ ), reflecting an increase in responding as training progressed (linear trend,  $F_{1,14} = 22.766, p < 0.001$ ), but no Session by Group interaction ( $F_{4,56} = 1.055, p > 0.05$ ), indicating that this change did not differ as a function of group.

### Experiment 3

#### *Sign-Tracking: Additional statistics on lever-press responding*

For lever-press responding during the CS in groups trained on the sign-tracking procedure, the analysis reveals that in addition to main effects of Group, there were also main effects of session in both the drug-treatment and post-treatment periods ( $F_{6,84} = 22.644, p < 0.001$ ;  $F_{4,56} = 6.760, p < 0.001$ , respectively). Simple effects analysis of the Session by Group interaction in each case ( $F_{6,84} = 8.796, p < 0.001$ ;  $F_{4,56} = 4.619, p < 0.05$ , respectively) revealed that the increase in responding across session was specific to the saline-treated group during the treatment period ( $F_{6,9} = 6.562, p < 0.05$ ;  $F < 1$  for eticlopride) and the eticlopride-treated group during post-treatment period ( $F_{4,11} = 4.160, p < 0.05$ ;  $F_{4,11} = 1.010, p > 0.05$  for saline).

#### *Sign-Tracking: Magazine-entry responding*

Figure S6 displays the average rates of magazine entry responding during lever CS presentations for groups trained on the sign-tracking procedure. Two-way ANOVAs performed for drug-treatment and post-treatment periods (sessions 1-7 and 8-12, respectively) show that eticlopride-treated animals responded at a lower rate relative to saline-treated controls during the drug-treatment period ( $F_{1,14} = 22.062, p < 0.001$ ) and at a higher rate during the post-treatment period ( $F_{1,14} = 15.500, p = 0.001$ ). Across the drug-treatment sessions, there was also a significant main effect of Session ( $F_{6,84} = 7.861, p < 0.001$ ) and a significant Session by Group

interaction ( $F_{6,84} = 4.768, p < 0.001$ ). Simple effects analysis demonstrates that the effect of Session was significant in both saline- and eticlopride-treated groups ( $F_{6,9} = 5.709, p < 0.05$  and  $F_{6,9} = 3.647, p < 0.05$ , respectively). However, differences in the change across sessions for saline- vs. eticlopride-treated groups are indicated by pairwise comparisons that show responding for the saline-treated group was higher than in the  $\alpha$ -flupenthixol-treated group on sessions 1, 2, 3, and 4 (minimum  $F_{1,14} = 7.479, p < 0.05$ ), but not on sessions 5, 6, and 7 (maximum  $F_{1,14} = 3.359, p > 0.05$ ) as responding in the saline-treated group declined. In the post-treatment sessions, the main effect of Session was again significant ( $F_{4,56} = 17.903, p < 0.001$ ), reflecting further decline in magazine entry responding (linear trend,  $F_{1,14} = 24.349, p < 0.001$ ). There was also a significant Session by Group interaction ( $F_{4,56} = 4.705, p < 0.05$ ), but simple effects analysis did not reveal any meaningful group differences in the change in responding across sessions.

*Goal-Tracking: Additional statistics on magazine-entry responding*

In addition to the main effect of Group, for magazine entry responding during the CS-PreCS period in groups trained on the goal-tracking procedure, there was a main effect of Session ( $F_{6,84} = 9.278, p < 0.001$ ) and Session by Group interaction ( $F_{6,84} = 4.461, p < 0.05$ ) in the treatment sessions. Follow-up analysis showed that the session effect was specific to an increase in the saline-treated group ( $F_{6,9} = 11.693, p < 0.05$ ;  $F_{6,9} = 1.891; p > 0.05$  for eticlopride). In the post-treatment period, there was also a main effect of Session ( $F_{4,56} = 3.977, p < 0.05$ ), but no Session by Group interaction ( $F < 1$ ).

Looking at responding during the PreCS period only (Figure S7a), two way ANOVAs performed for the drug-treatment and post-treatment periods (session 1-7 and 8-12, respectively) indicate that responding in the eticlopride-treated group was significantly lower than in saline-treated group during the drug-treatment period ( $F_{1,14} = 33.057, p < 0.001$ ), but not during the post-treatment period ( $F < 1$ ). In neither the drug-treatment period nor the post-treatment period was there any effect of Session ( $F_{1,14} = 1.161, p > 0.05$  and  $F_{1,14} = 1.834, p > 0.05$ , respectively) or Session by Group interaction ( $F_{1,14} = 1.684, p > 0.05$  and  $F < 1$ , respectively).

For responding during the CS period only (Figure S7b), analyses similarly revealed that rates of magazine entry in the eticlopride-treated group was significantly impaired relative to saline-treated controls during the drug-treatment period ( $F_{1,14} = 34.211, p < 0.001$ ), but not during the post-treatment period ( $F < 1$ ). In the drug-treatment period, there was also a significant effect

of Session ( $F_{6,84} = 5.731, p < 0.001$ ), reflecting an increase in responding across training (linear trend,  $F_{1,14} = 33.404, p < 0.001$ ). There was also a significant Session by Group interaction ( $F_{6,84} = 4.433, p = 0.001$ ), suggesting that the change in responding across sessions differed between eticlopride- and saline-treated groups. However, simple effects analysis indicates this change was significant in both cases ( $F_{6,9} = 6.561, p < 0.05$  and  $F_{6,9} = 5.477, p < 0.05$ , respectively). In the post-treatment period, there was a main effect of Session ( $F_{4,56} = 5.522, p = 0.001$ ), reflecting an increase in responding as training progressed (linear trend,  $F_{1,14} = 8.488, p < 0.05$ ), but no Session by Group interaction ( $F < 1$ ), indicating that this change did not differ as a function of group.



**Fig. S1** Rates of lever pressing (sign-tracking) and magazine entry (goal-tracking) during the CS period, in addition to baseline magazine entry behaviour during the PreCS period, for control animals in a collection of studies implementing a sign-tracking protocol (lever CS). Rates of sign-tracking typically increase across training, whilst rates of goal-tracking initially increase then decline, eventually to below baseline levels. Error bars represent  $\pm$ SEM

**Fig. S2** Rates of magazine entry (goal-tracking) during the CS for groups trained on the sign-tracking cue. In saline-treated animals, goal-tracking behaviour was initially present, but then declined across training (as sign-tracking behaviour increased – see Figure 1). Treatment with  $\alpha$ -flupenthixol impaired performance of goal-tracking on the sessions on which it was administered (1-7), and performance on subsequent drug-free sessions (8-12) showed the same pattern as was observed for the saline-treated animals at the beginning of training. Error bars represent  $\pm$ SEM

**Fig. S3** Rates of magazine entry during the PreCS period for groups trained on the goal-tracking procedure. Administration of  $\alpha$ -flupenthixol impaired baseline rates of magazine responding (sessions 1-7), but this showed an immediate recovery in the post-treatment period (8-12). Error bars represent  $\pm$ SEM

**Fig. S4** Rates of magazine entry (goal-tracking) during the CS for groups trained on the sign-tracking cue. In saline-treated animals, goal-tracking behaviour was initially present, but then declined across training (as sign-tracking behaviour increased – see Figure 2). Treatment with SCH39166 impaired performance of goal-tracking on the sessions on which it was administered (1-7), and performance on subsequent drug-free sessions (8-12) showed the same pattern as was observed for the saline-treated animals at the beginning of training. Error bars represent  $\pm$ SEM

**Fig. S5** Panel (a) displays rates of magazine entry during the PreCS, while panel (b) displays rates of magazine entry (goal-tracking) during the CS, both for groups trained on the goal-tracking procedure. In the drug-treatment sessions (1-7), rates of magazine entry during the

PreCS and CS periods were impaired in the SCH39166-treated groups. In the post-treatment sessions (8-12), this impairment was no longer significant during the CS period, whereas in the PreCS period the effect was in the reverse direction; rates of magazine entry were significantly higher in the previously SCH39166-treated group. Error bars represent  $\pm$ SEM

**Fig. S6** Rates of magazine entry (goal-tracking) during the CS for groups trained on the sign-tracking cue. In saline-treated animals, goal-tracking behaviour was initially present, but then declined across training (as sign-tracking behaviour increased – see Figure 3). Treatment with eticlopride impaired performance of goal-tracking on the sessions on which it was administered (1-7), while performance on subsequent drug-free sessions (8-12) was higher in the previously eticlopride-treated animals than the saline-treated animals. Error bars represent  $\pm$ SEM

**Fig. S7** Panel **(a)** displays rates of magazine entry during the PreCS, while panel **(b)** displays rates of magazine entry (goal-tracking) during the CS, both for groups trained on the goal-tracking procedure. In the drug-treatment sessions (1-7), rates of magazine entry during the PreCS and CS periods were impaired in the eticlopride-treated groups. In contrast, rates of responding did not differ significantly between groups in either the PreCS or CS period across the post-treatment sessions (8-12). Error bars represent  $\pm$ SEM

Fig. S1

### Sign- and Goal-Tracking Across Training

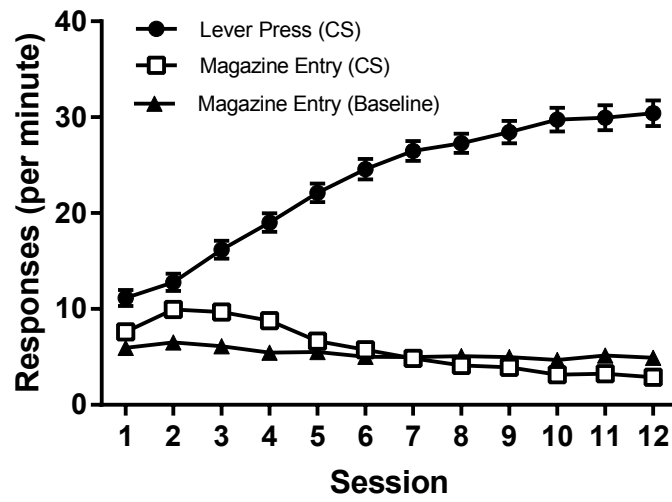

Fig. S2

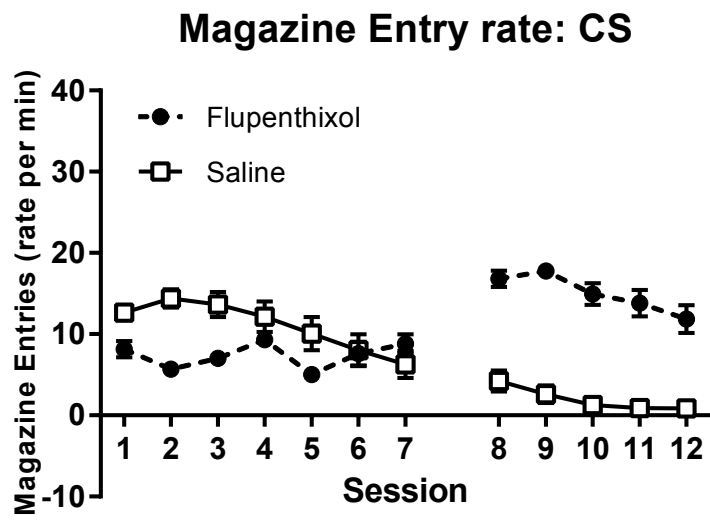

Fig. S3

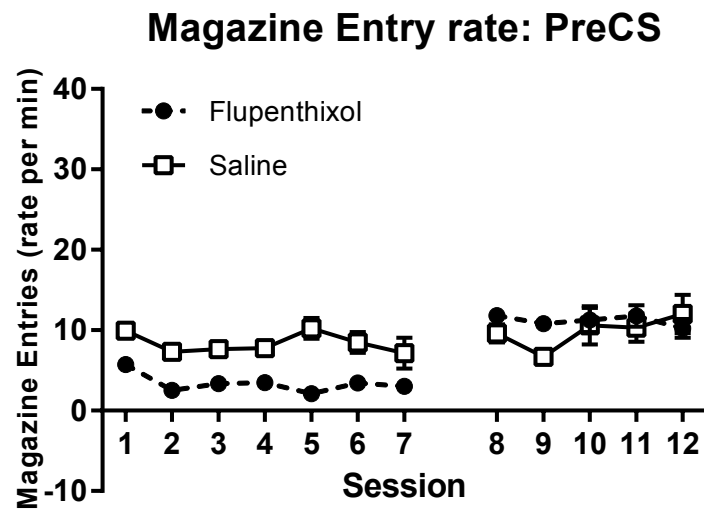

Fig. S4

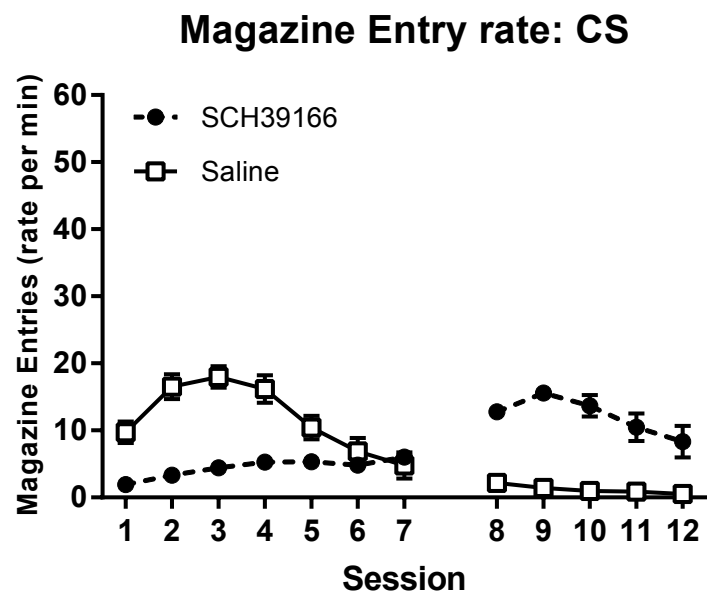

Fig. S5

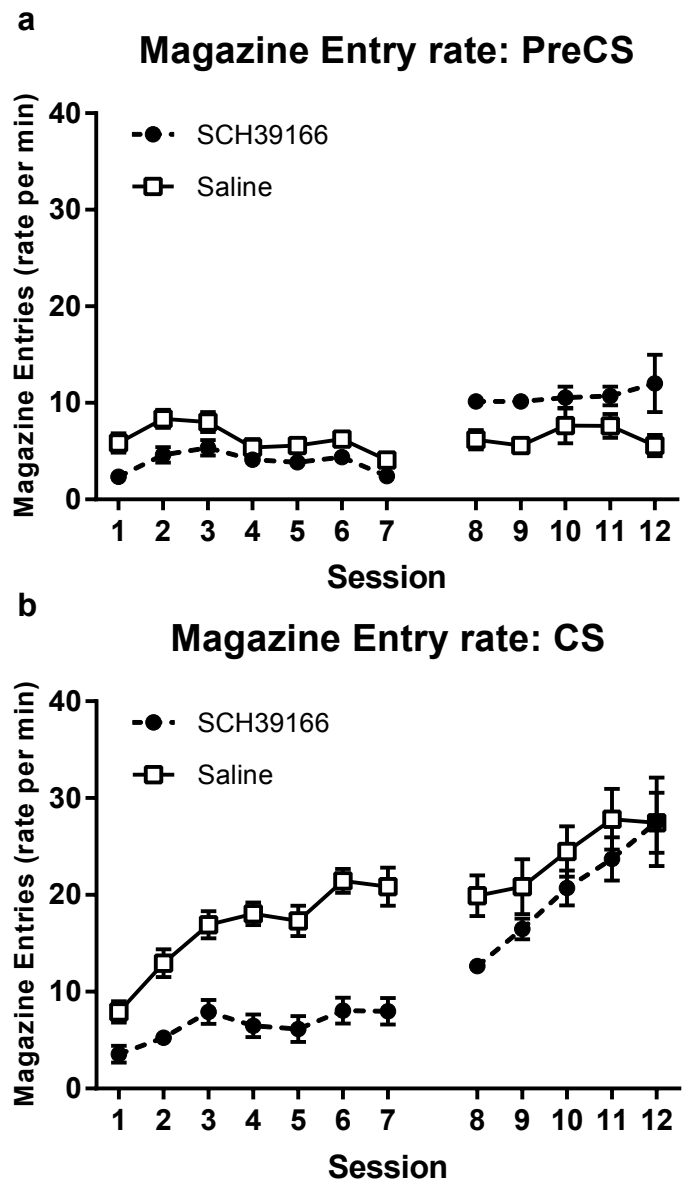

Fig. S6

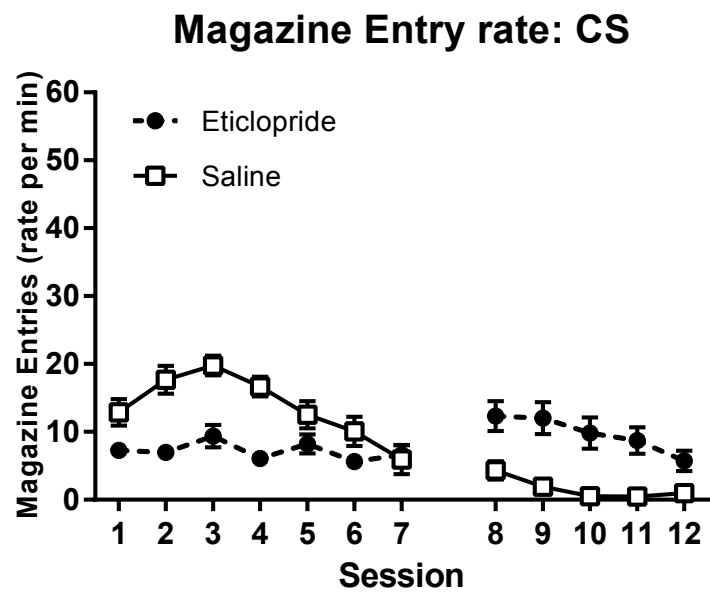



Fig. S7

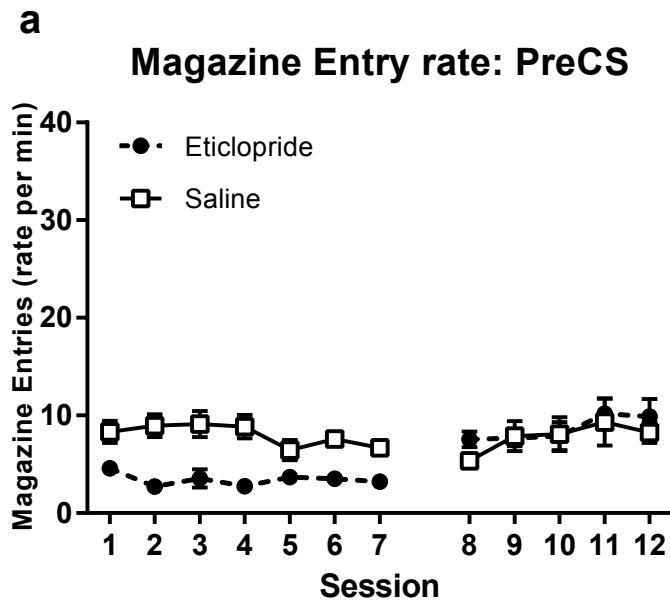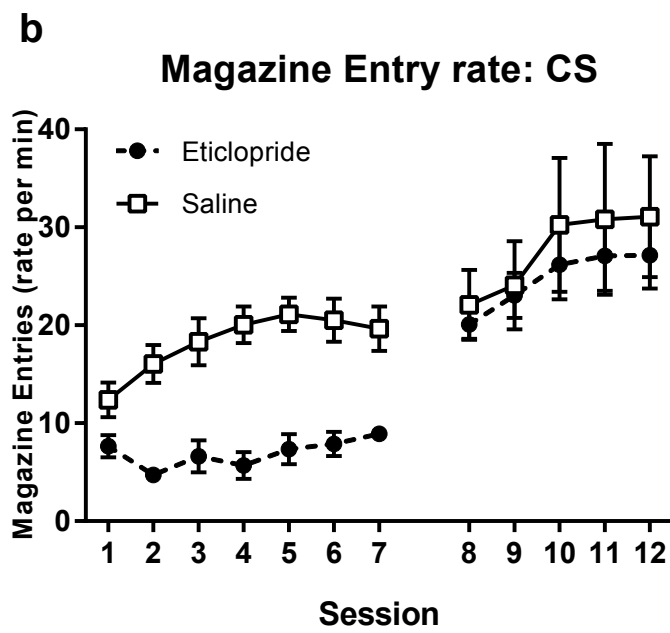

Supplement: 213_2019_5169_MOESM1_ESM.pdf [file 213_2019_5169_MOESM1_ESM.pdf]
